# Supplementary material for: Single-cell analysis reveals transcriptional dynamics in healthy primary parathyroid tissue
Source: HighWire-hosted journal article supplement (doi:10.1101/gr.278215.123), 2024-06-01
Supplement: Supplemental_Figures_Combined.pdf [file Supplemental_Figures_Combined.pdf]

**NHP**

**Human**

pre-DecontX  
counts per cluster

post-DecontX  
counts per cluster

pre-DecontX  
counts per cluster

post-DecontX  
counts per cluster

*PTH*

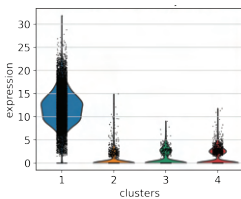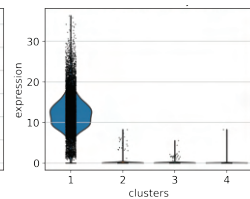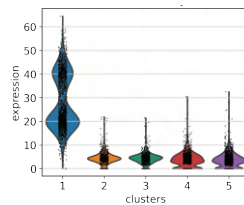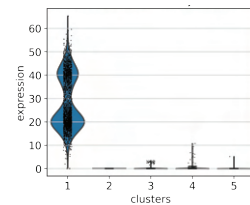

*RARRES2*

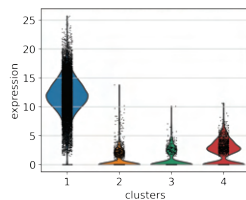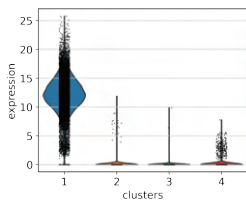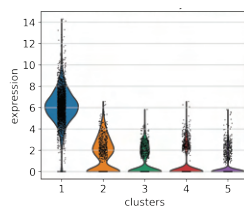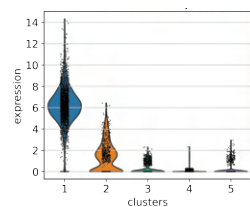

*GCM2*

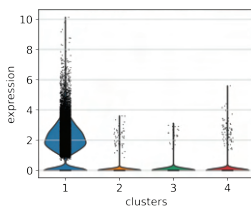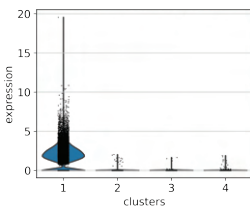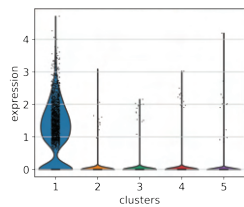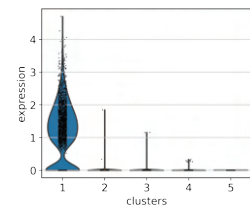

*CHGA*

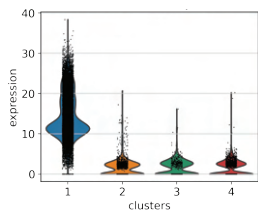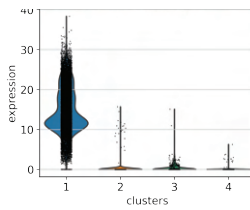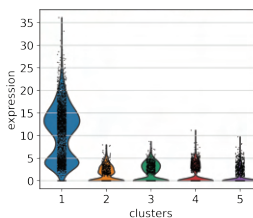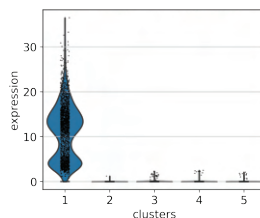

*COX1 /  
MT-CO1*

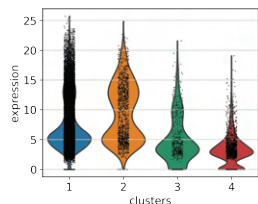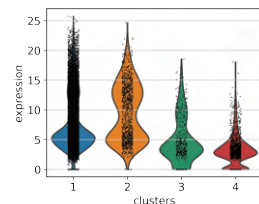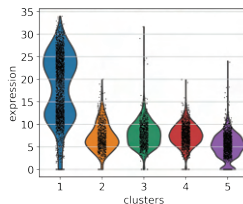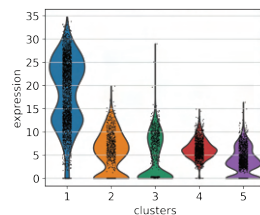

*COX2 /  
MT-CO2*

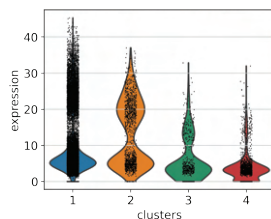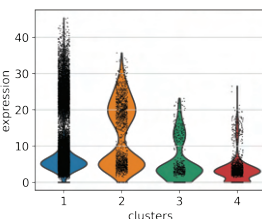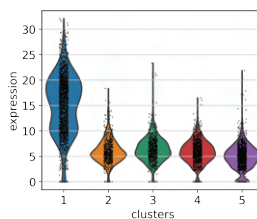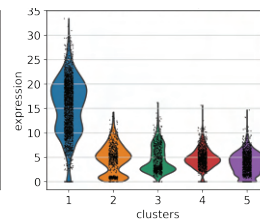

Figure S1: DecontX removes ambient transcripts from cell suspensions. Counts of UMIs per cluster are shown for parathyroid-relevant genes for primate and human samples, pre- and post-processing with DecontX. Low level *PTH* transcripts are observed in all cell clusters before processing, despite clear delineation of cell types in each cluster. Post-processing counts of parathyroid-relevant genes are preserved post-processing.

A

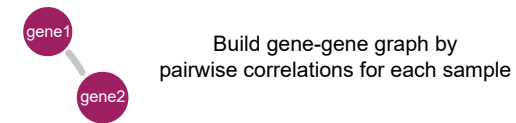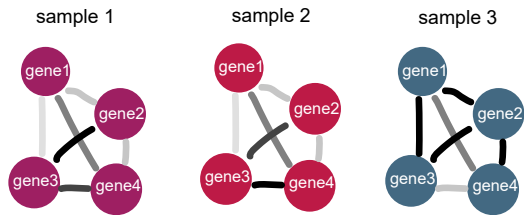

Compute correlation between gene-gene graphs

B

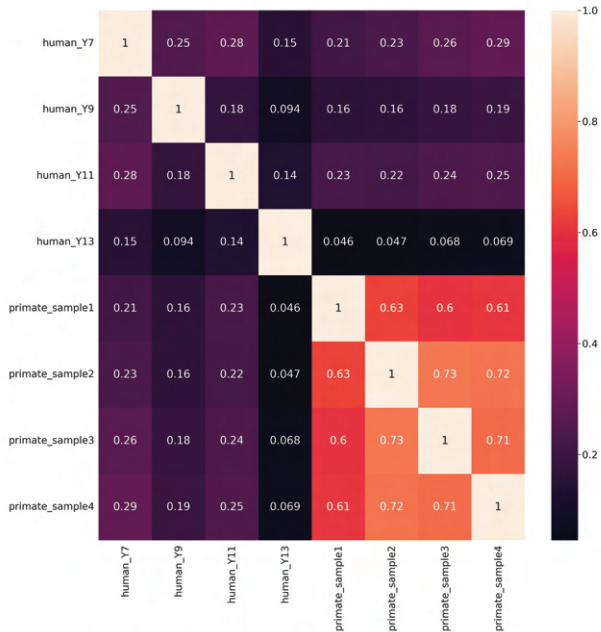

Figure S2: Scoring gene correlations between samples. (a) Schematic of how pairwise gene correlations were calculated. (b) Gene-gene correlations computed per replicate based on denoised and pseudobulked measurements, then compared via correlation of gene-gene graphs and visualized.

**A**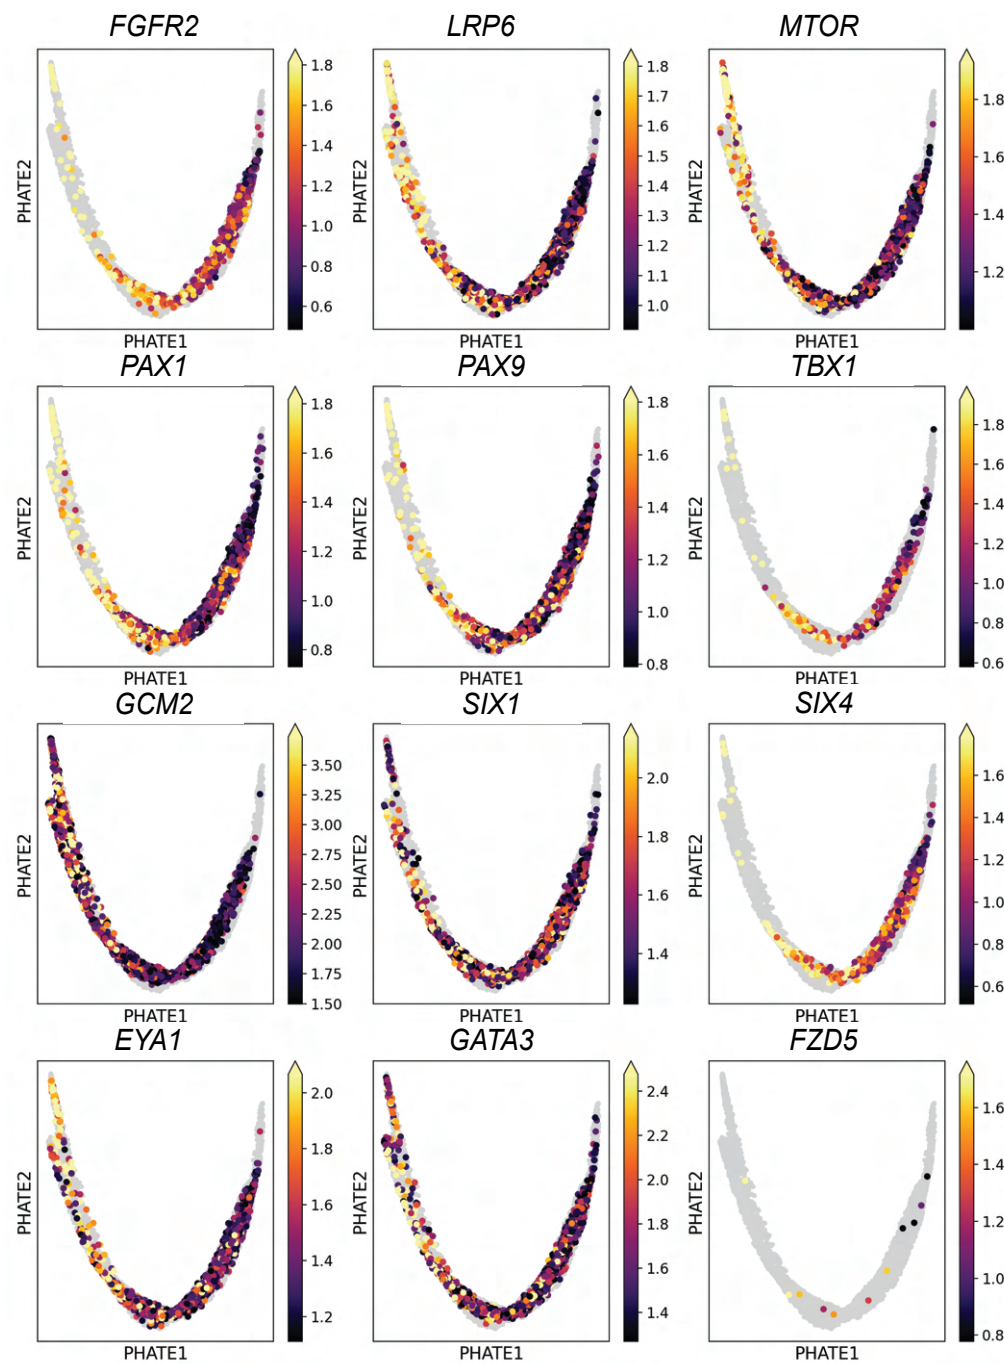**B**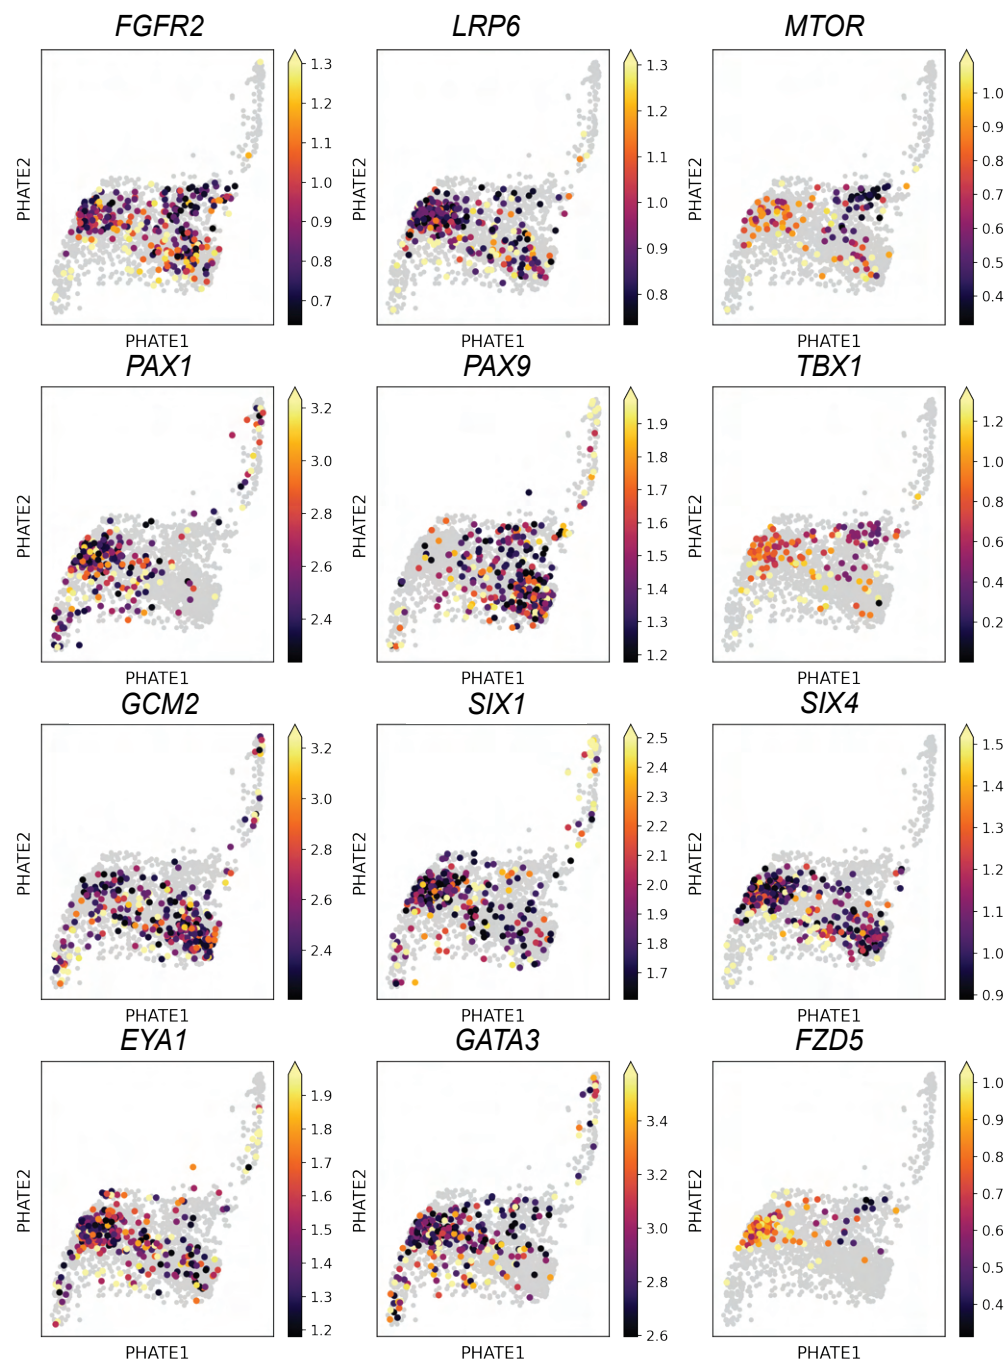

Figure S3: Genes implicated in parathyroid development enriched in *GCM2<sup>hi</sup>PTH<sup>lo</sup>* in NHP samples only. The top 10% of cells expressing -developmentally relevant genes in (a) NHP cells and (b) human cells.

**A**

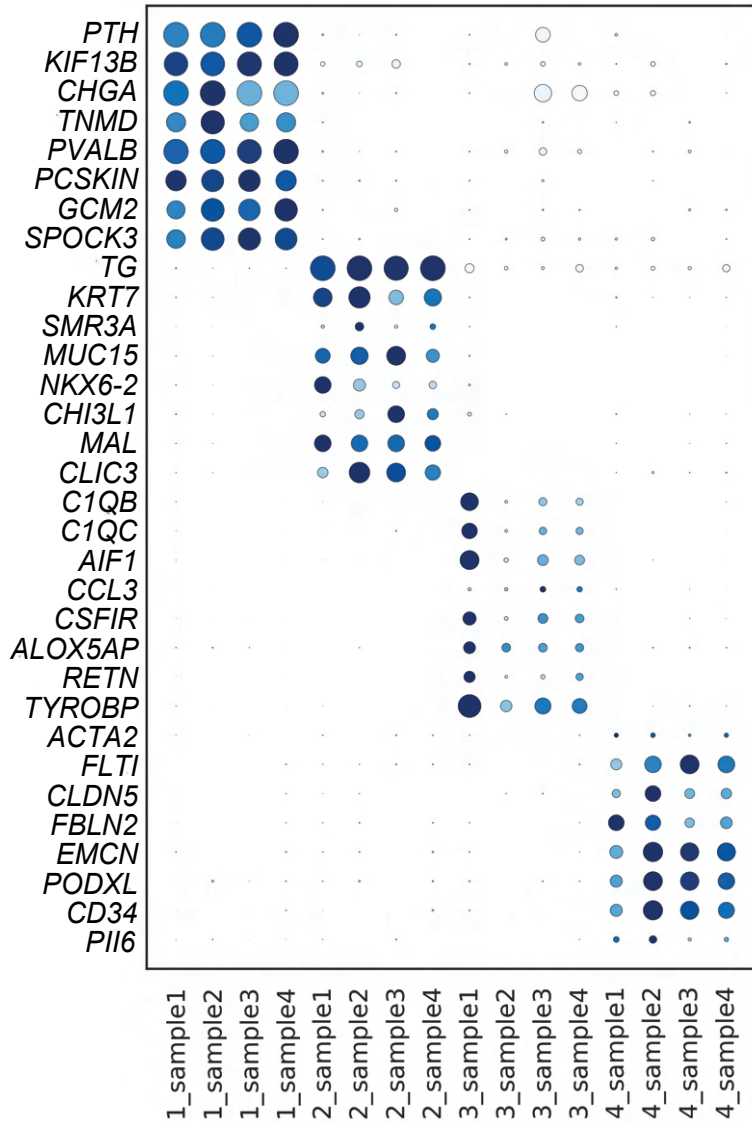

**B**

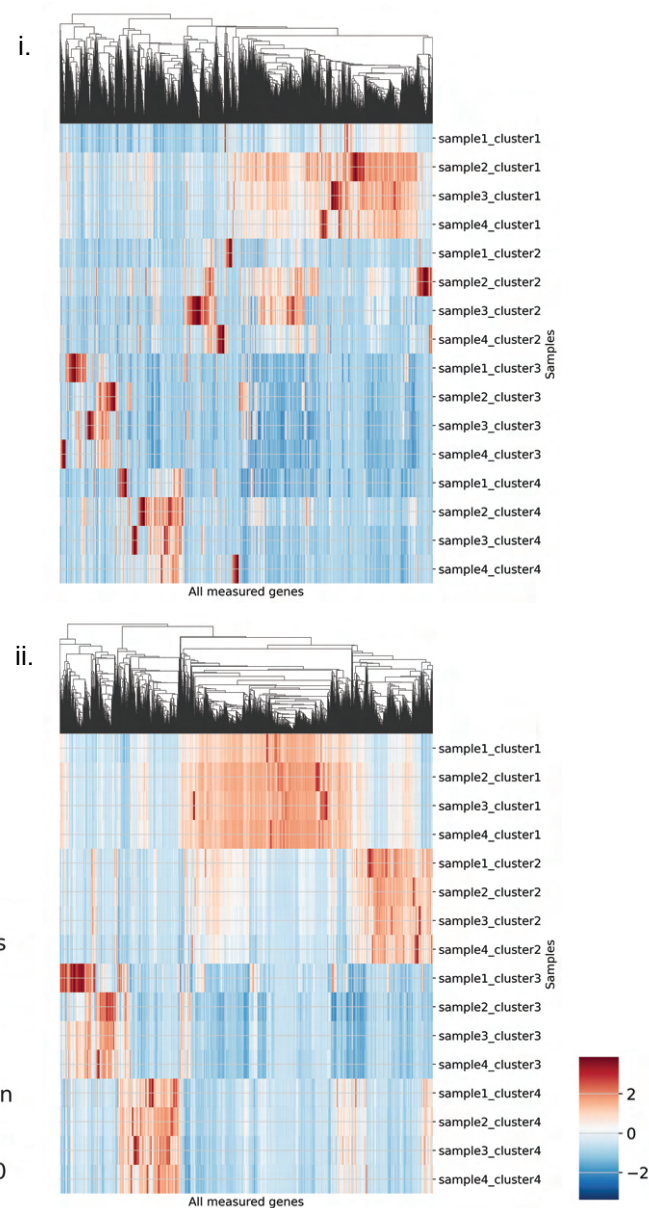

Figure S4: Comparison of cell type reproducibility across NHP samples. (a) Visualization of top differentially expressed genes per cluster, resolved per replicate for NHP samples. (b) Genome-scale heatmaps (i) before batch correction and (ii) after batch correction.



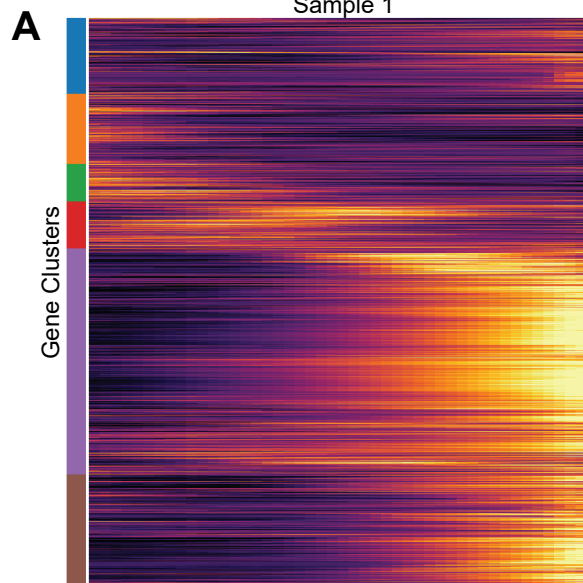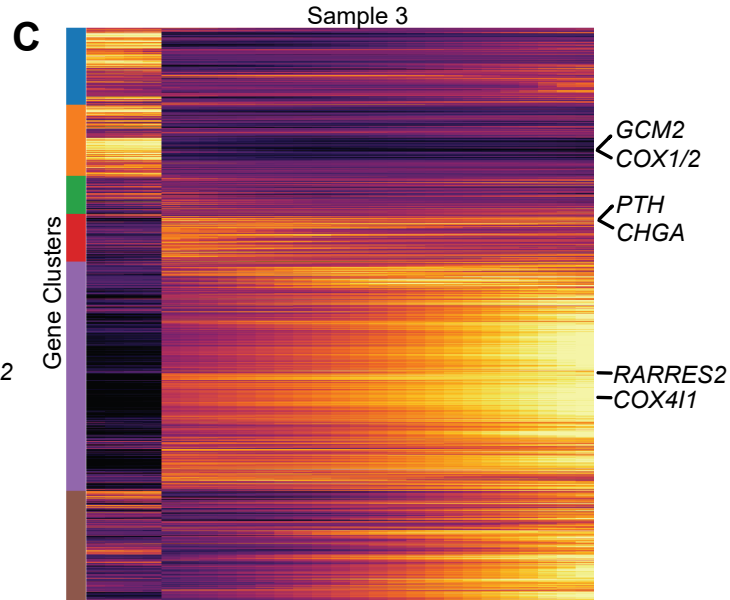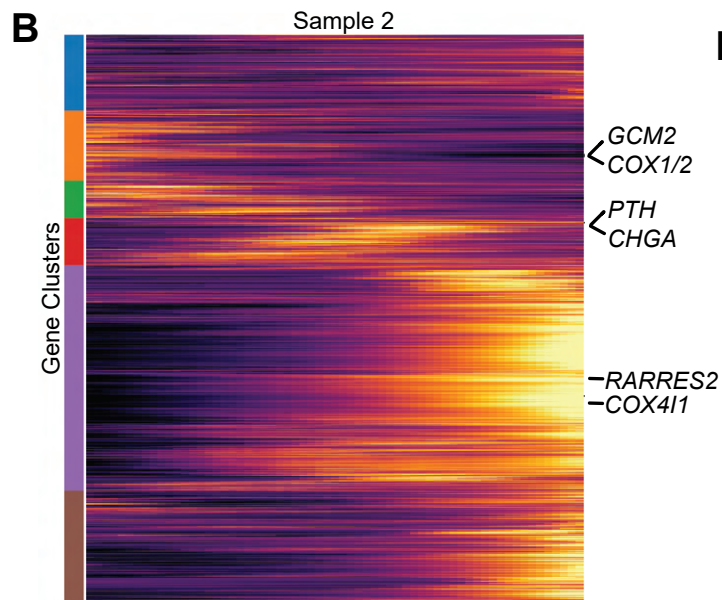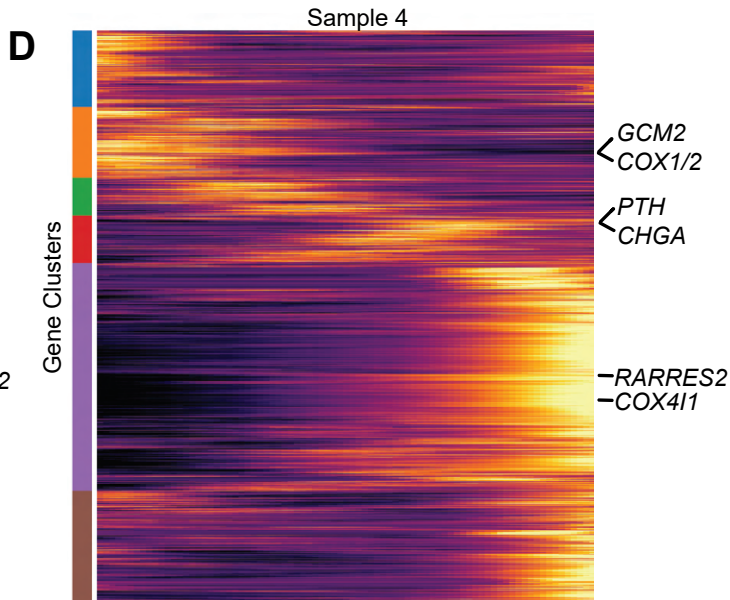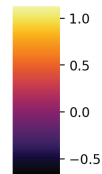

Figure S5: Comparison of gene trend reproducibility across NHP samples. Visualization of gene expression dynamics across time per sample (a) Sample 1 (b) Sample 2 (c) Sample 3 (d) Sample 4, ordered by gene heatmap in Figure 3.

**A**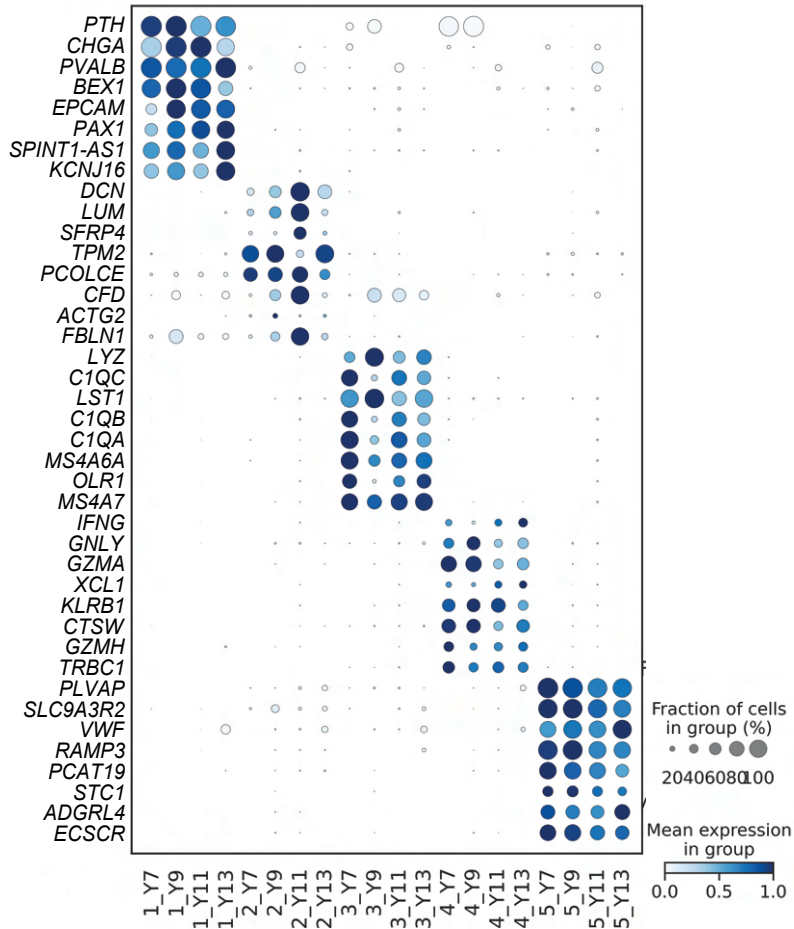**B**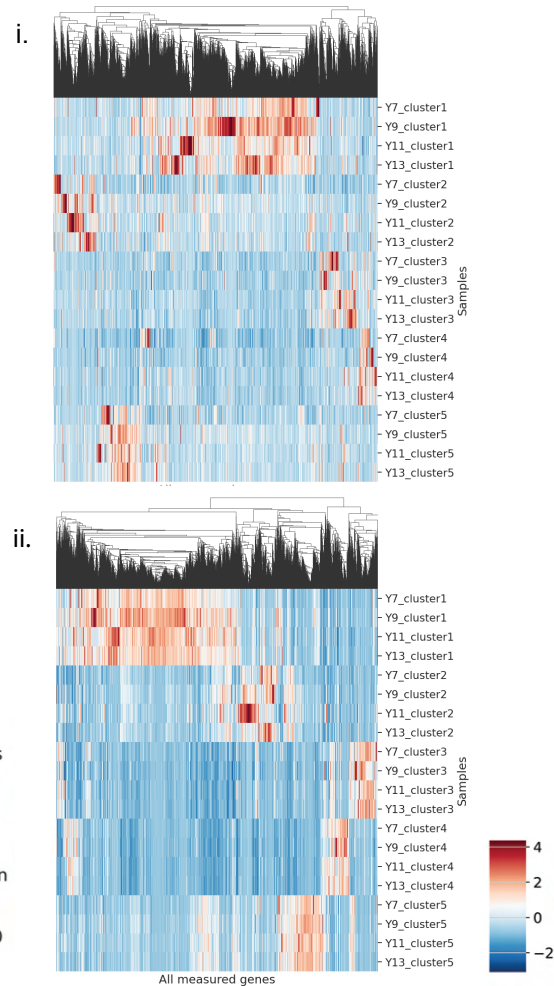

Figure S6: Comparison of cell type reproducibility across human samples. (a) Visualization of top differentially expressed genes per cluster, resolved per sample for human samples. (b) Genome-scale heatmap for human samples.

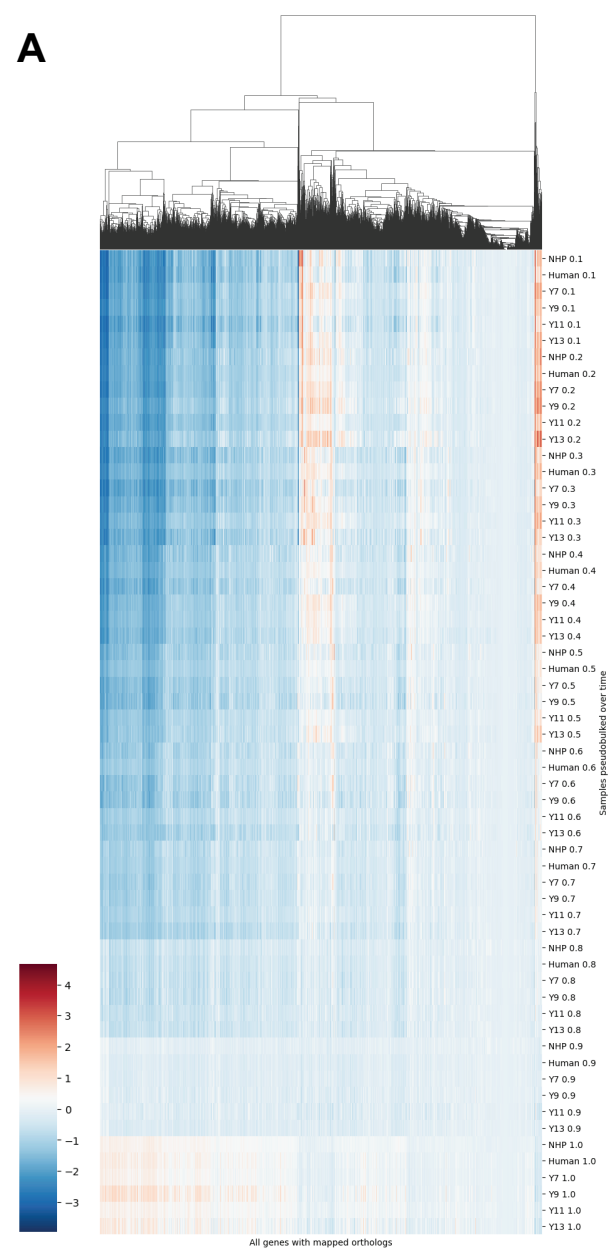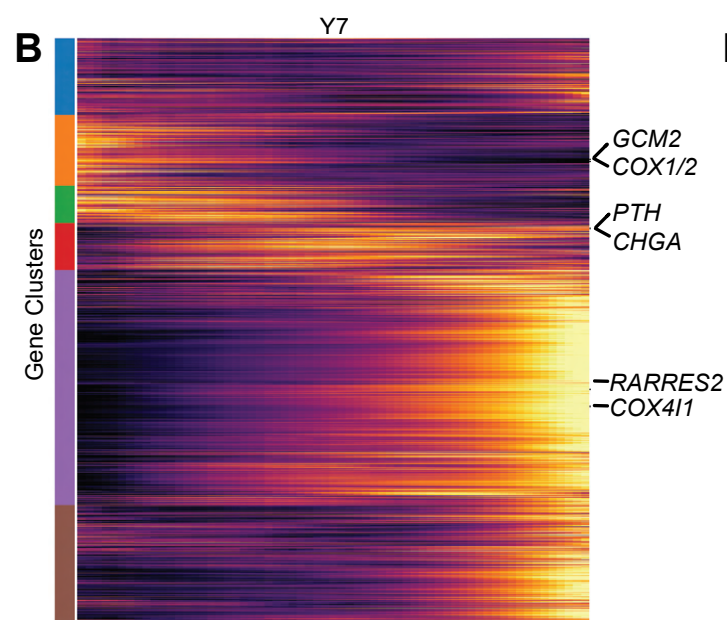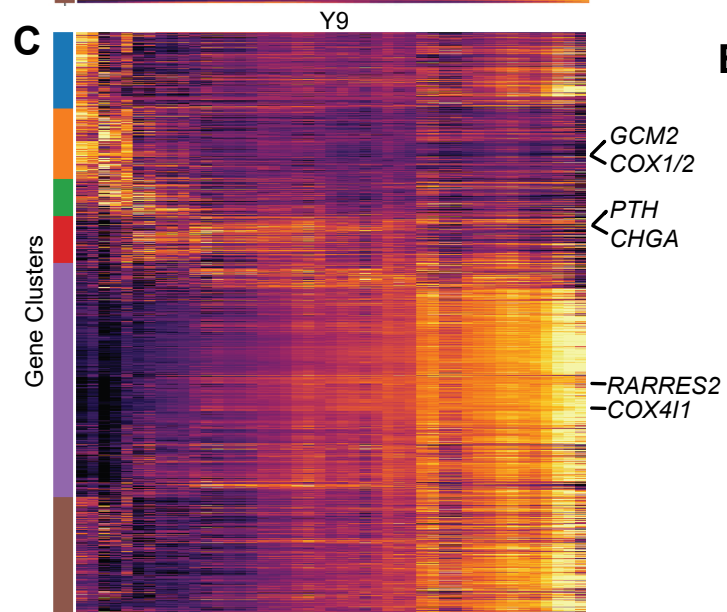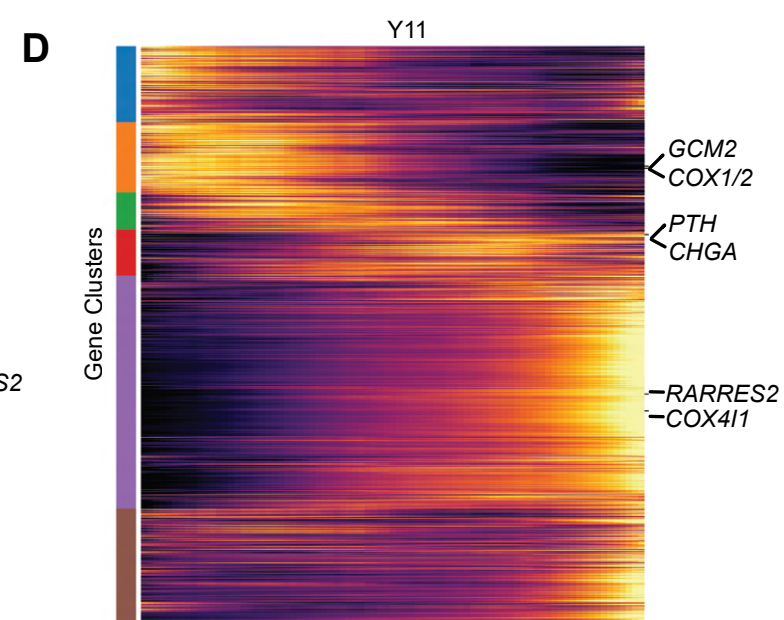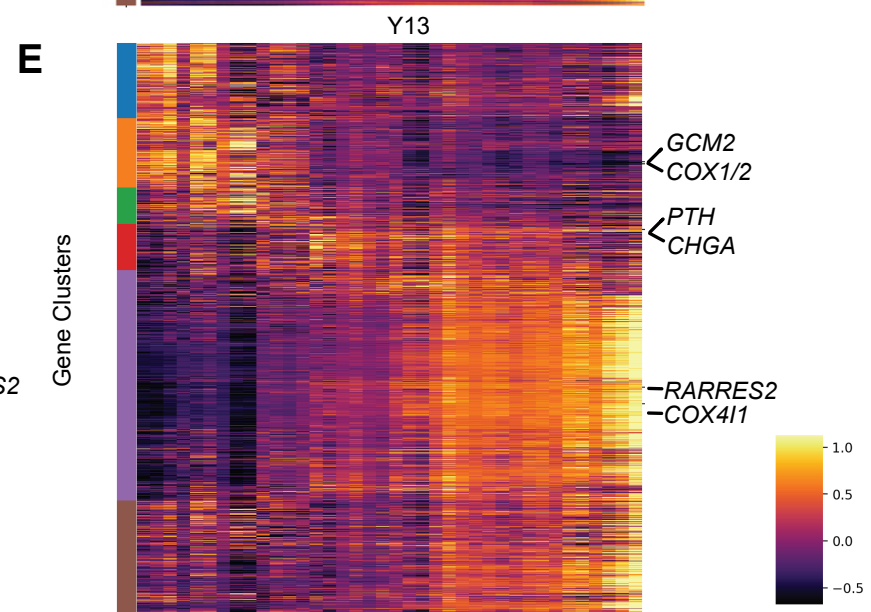

Figure S7: Comparison of NHP samples and mapped human samples. (a) Genome-scale heatmap of NHP samples and mapped human samples, pseudobulked over time. Visualization of gene expression dynamics per sample (b) Y7 (c) Y9 (d) Y11 (e) Y13.

| CycleGAN CV    | Total Corr.        | Y7 Corr.           | Y9 Corr.           | Y11 Corr.          | Y13 Corr.          |
|----------------|--------------------|--------------------|--------------------|--------------------|--------------------|
| 0              | -0.066             | -0.071             | -0.211             | -0.042             | -0.159             |
| 1              | 0.000              | 0.029              | 0.135              | -0.086             | -0.012             |
| 2              | -0.003             | 0.028              | -0.013             | -0.006             | -0.150             |
| 3              | 0.031              | 0.049              | 0.003              | 0.039              | 0.046              |
| 4              | -0.161             | -0.157             | -0.334             | -0.167             | -0.226             |
| 5              | 0.068              | 0.131              | 0.092              | 0.057              | 0.057              |
| 6              | -0.121             | -0.156             | -0.208             | -0.105             | -0.131             |
| 7              | -0.029             | -0.008             | -0.158             | 0.004              | -0.197             |
| 8              | 0.067              | 0.082              | 0.164              | 0.024              | -0.054             |
| 9              | 0.035              | 0.034              | 0.045              | 0.066              | 0.007              |
| mean $\pm$ std | -0.018 $\pm$ 0.077 | -0.004 $\pm$ 0.096 | -0.049 $\pm$ 0.169 | -0.022 $\pm$ 0.077 | -0.082 $\pm$ 0.103 |

| scMMGAN CV     | Total Corr.              | Y7 Corr.                 | Y9 Corr.                 | Y11 Corr.                | Y13 Corr.                |
|----------------|--------------------------|--------------------------|--------------------------|--------------------------|--------------------------|
| 0              | 0.173                    | 0.210                    | 0.328                    | 0.167                    | 0.264                    |
| 1              | 0.212                    | 0.235                    | 0.385                    | 0.176                    | 0.229                    |
| 2              | 0.194                    | 0.203                    | 0.294                    | 0.170                    | 0.275                    |
| 3              | 0.173                    | 0.232                    | 0.333                    | 0.144                    | 0.179                    |
| 4              | 0.185                    | 0.202                    | 0.406                    | 0.160                    | 0.165                    |
| 5              | 0.155                    | 0.205                    | 0.287                    | 0.155                    | 0.064                    |
| 6              | 0.169                    | 0.175                    | 0.263                    | 0.145                    | 0.148                    |
| 7              | 0.173                    | 0.217                    | 0.382                    | 0.153                    | 0.238                    |
| 8              | 0.175                    | 0.192                    | 0.300                    | 0.156                    | 0.171                    |
| 9              | 0.170                    | 0.182                    | 0.285                    | 0.166                    | 0.122                    |
| mean $\pm$ std | <b>0.178</b> $\pm$ 0.016 | <b>0.205</b> $\pm$ 0.019 | <b>0.326</b> $\pm$ 0.049 | <b>0.159</b> $\pm$ 0.011 | <b>0.185</b> $\pm$ 0.066 |

Figure S8: Ten-fold cross-validation (CV) for CycleGAN (top) versus scMMGAN (bottom). CV computed for gene correlation between input and mapped human samples across all cells (Total Corr.) and resolved per human sample.



Cluster 1 GO terms

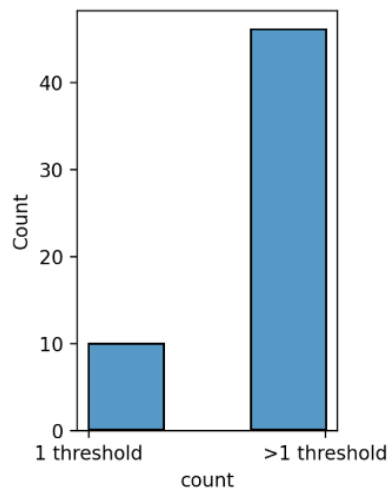

Cluster 2 GO terms

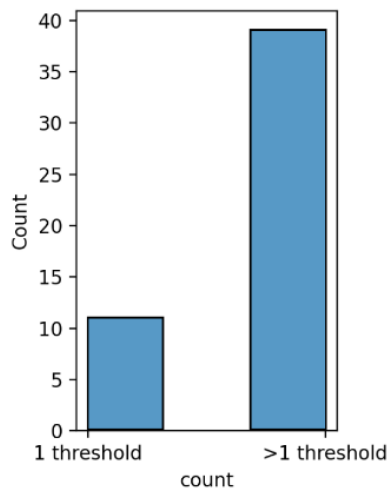

Cluster 3 GO terms

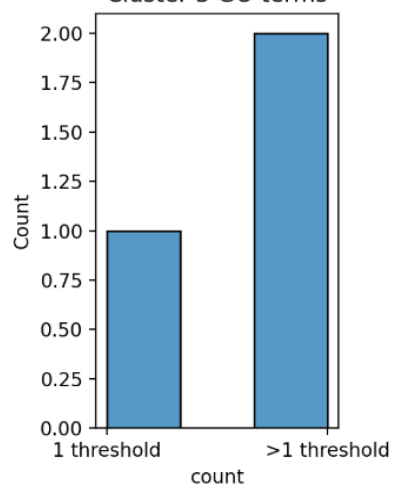

Cluster 4 GO terms

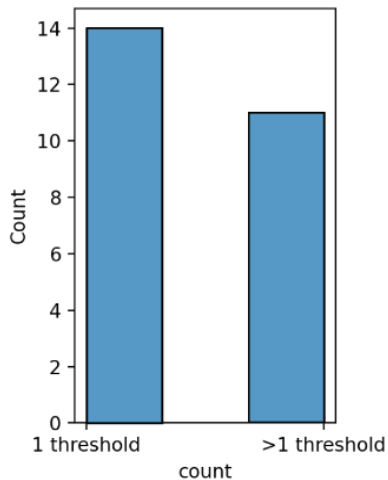

Cluster 5 GO terms

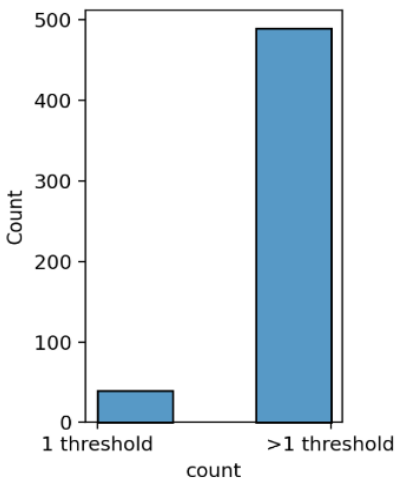

Cluster 6 GO terms

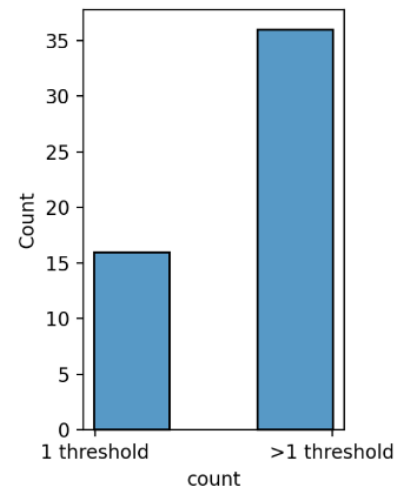

Figure S9: Number of GO terms enriched when using one threshold cutoff for variable genes ( $p < 0.05$ ) compare to more than one highly variable gene cutoff value (in this case 0.01, 0.025, 0.075, and 0.1 were used).

**A**

Primate parathyroid cells  
scVelo-derived pseudotime

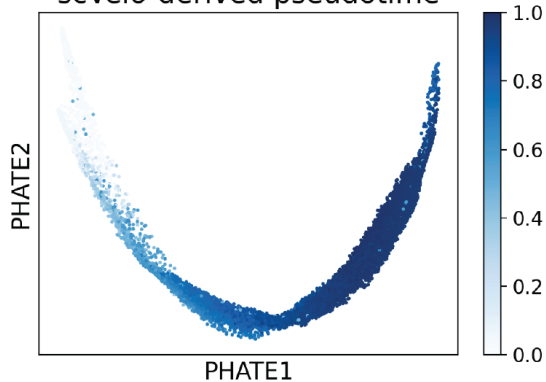**B**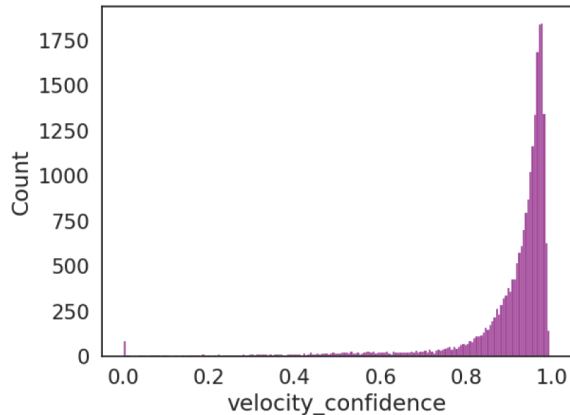

Figure S10: scVelo analysis of time axis. (a) Pseudotime axis computed by scVelo (b) distribution of velocity estimation confidence across all cells.

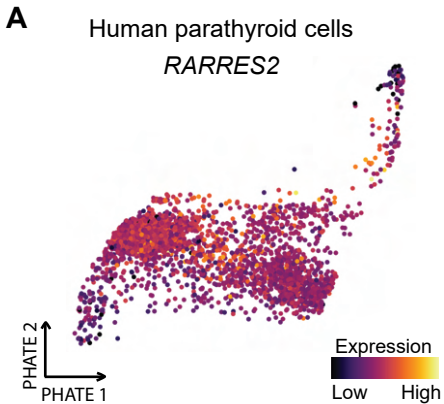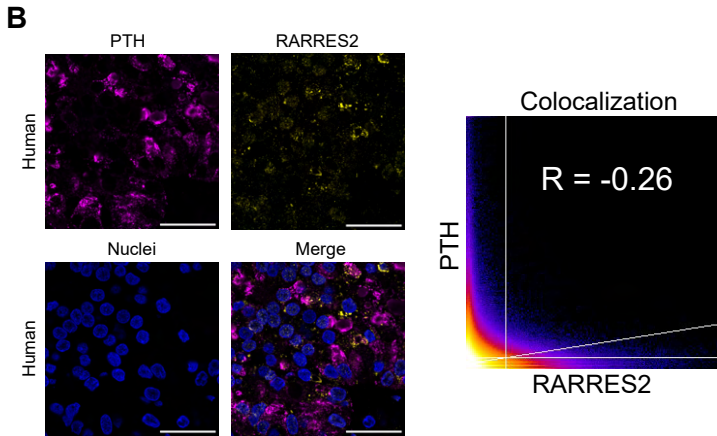

Figure S11: (A) Relative RNA transcript distribution of *RARRES2* in human hyperfunctioning parathyroid cells across scRNA-seq datasets. (B) Confocal fluorescence image of immunolabelled human hyperfunctioning parathyroid tissue and pixel-wise colocalization heatmap. Vertical and horizontal lines indicate thresholds for colocalization, and the diagonal line is the linear best-fit ( $R = -0.26$ ) of pixels above the thresholds (Scale bars = 30  $\mu\text{m}$ ).
