# Supplementary material for: Single-cell analysis reveals transcriptional dynamics in healthy primary parathyroid tissue
Source: HighWire-hosted journal article supplement (doi:10.1101/gr.278215.123), 2024-06-01
Supplement: Supplemental_Note_1.pdf [file Supplemental_Note_1.pdf]

**Supplemental Note S1.** Preservation of diffusion distances reveals a single trajectory of parathyroid cells.

In single-cell transcriptomics, many analysis tools have been designed to embed individual cells into two-dimensions such that cells with similar expression are positioned close together [1-11]. PHATE [12] captures both local and global nonlinear structure using an information-geometric distance between data points. To do this, PHATE applies a diffusion framework popularized by diffusion maps [13]. Kobak and Linderman [14] have recently shown that difference in preservation of global structure between *t*-SNE and UMAP can be attributed to initialization with Laplacian eigenmaps [15], which are equivalent to diffusion maps for a symmetric normalized Markov matrix like in single-cell data.

To corroborate our findings in the paper, we show that visualization of the NHP parathyroid cells by the first two Laplacian eigenvectors captures the main axis of variation, which corresponds to a single trajectory. Visualization with UMAP and *t*-SNE using diffusion distances also identifies a single axis along which PTH changes nonlinearly.

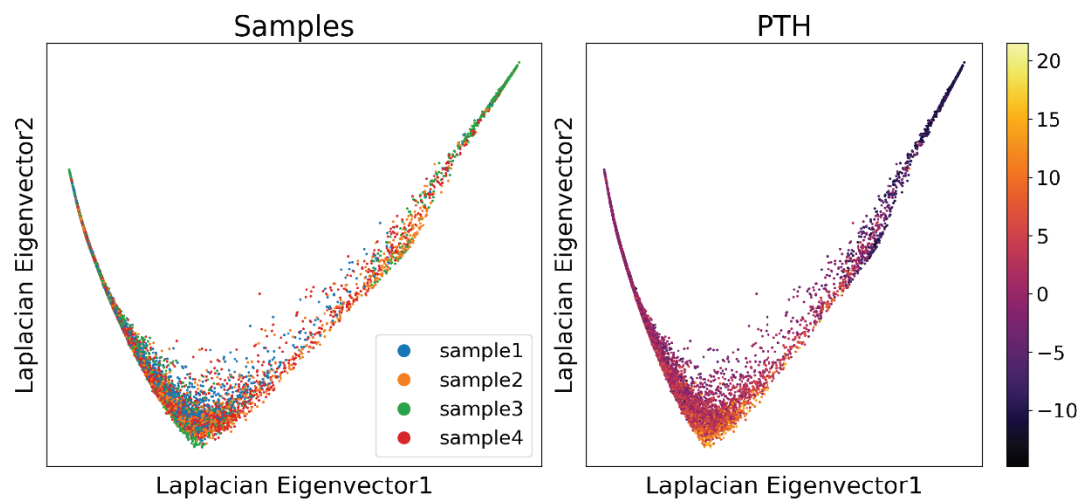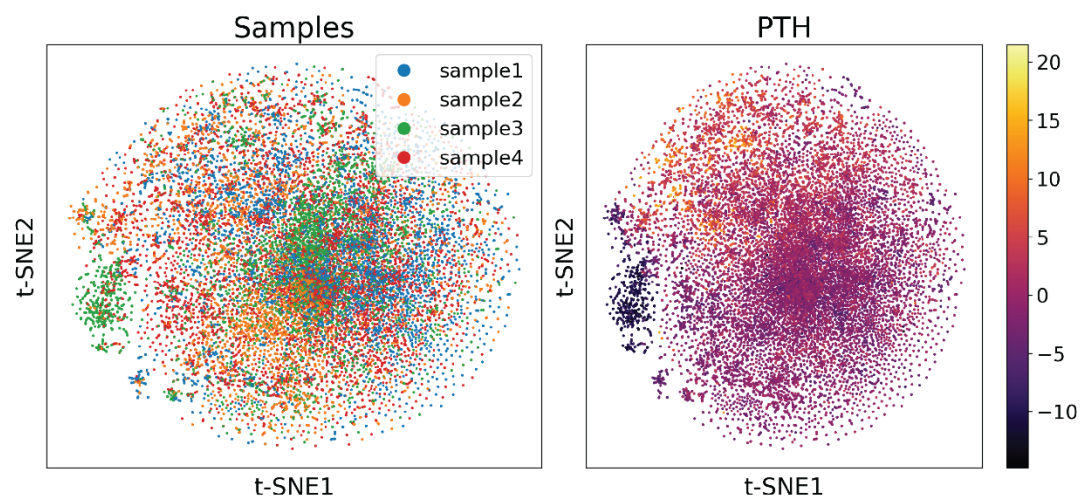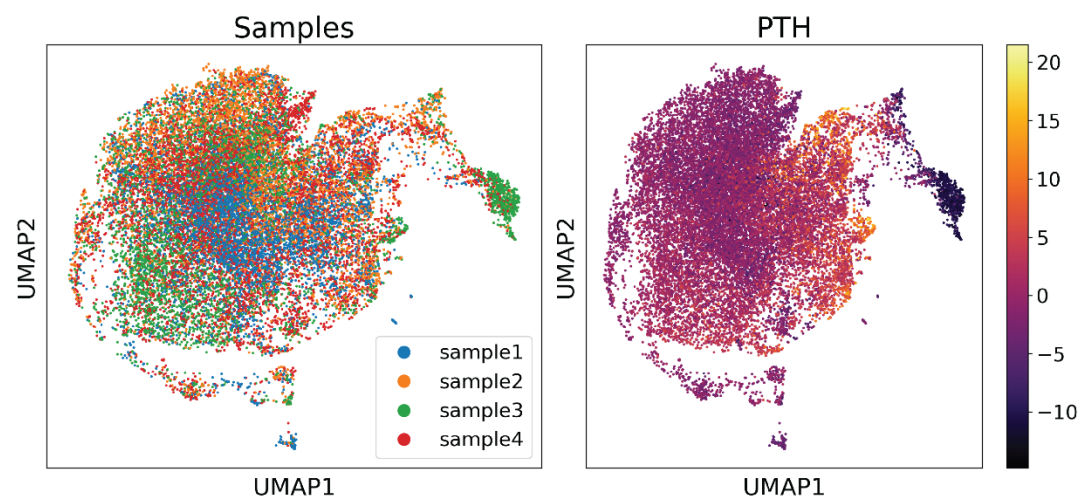

## References

1. van der Maaten, L. & Hinton, G. Visualizing data using t-SNE. *J. Mach. Learn. Res.* 9, 2579–2605 (2008).
2. Amir, E. D. et al. viSNE enables visualization of high dimensional single-cell data and reveals phenotypic heterogeneity of leukemia. *Nat. Biotechnol.* 31, 545–552 (2013).
3. Linderman, G. C., Rachh, M., Hoskins, J. G., Steinerberger, S. & Kluger, Y. Fast interpolation-based t-SNE for improved visualization of single-cell RNA-seq data. *Nat. Methods* 16, 243–245 (2019).
4. Tenenbaum, J. B., De Silva, V. & Langford, J. C. A global geometric framework for nonlinear dimensionality reduction. *Science* 290, 2319–2323 (2000).
5. Becht, E. et al. Dimensionality reduction for visualizing single-cell data using UMAP. *Nat. Biotechnol.* 37, 38–44 (2019).
6. Roweis, S. T. & Saul, L. K. Nonlinear dimensionality reduction by locally linear embedding. *Science* 290, 2323–2326 (2000).
7. Cox, T. F. & Cox, M. A. A. *Multidimensional Scaling* 2nd edn (Chapman & Hall/CRC, 2001).
8. De Silva, V. & Tenenbaum J. B. *Sparse Multidimensional Scaling Using Landmark Points* (Stanford University, 2004).
9. Unen, V. et al. Visual analysis of mass cytometry data by hierarchical stochastic neighbour embedding reveals rare cell types. *Nat. Commun.* 8, 1740 (2017).
10. Chen, L. & Buja, A. Local multidimensional scaling for nonlinear dimension reduction, graph drawing, and proximity analysis. *J. Am. Stat. Assoc.* 104, 209–219 (2009).
11. Moon, T. K. & Stirling, W. C. *Mathematical Methods and Algorithms for Signal Processing* (Prentice Hall, 2000).
12. Moon, K.R., van Dijk, D., Wang, Z. et al. Visualizing structure and transitions in high-dimensional biological data. *Nat Biotechnol* 37, 1482–1492 (2019).
13. Coifman, R. R. & Lafon, S. Diffusion maps. *Appl. Comput. Harmon. Anal.* 21, 5–30 (2006).
14. Kobak, D., Linderman, G.C. Initialization is critical for preserving global data structure in both t-SNE and UMAP. *Nat Biotechnol* 39, 156–157 (2021).
15. M. Belkin and P. Niyogi, "Laplacian Eigenmaps for Dimensionality Reduction and Data Representation," in *Neural Computation*, vol. 15, no. 6, pp. 1373-1396, 1 June 2003
